# Supplementary material
Source: publisher figshare collection journal article supplement (https://acs.figshare.com/ndownloader/files/3970408)
Supplement: Supplementary file 1 [file 3970408]

## New performance metrics for quantitative PCR microbial source tracking methods Supplementary Material

Dan Wang<sup>1\*</sup>, Hyatt C. Green<sup>2</sup>, Orin C. Shanks<sup>2</sup>, Alexandria B. Boehm<sup>1</sup>

1. Environmental and Water Studies, Dept. Civil and Environmental Engineering, Stanford University, Stanford, CA, 94305, USA
2. U.S. Environmental Protection Agency, Office of Research and Development, National Risk Management Research Laboratory, Cincinnati, OH 45268, USA

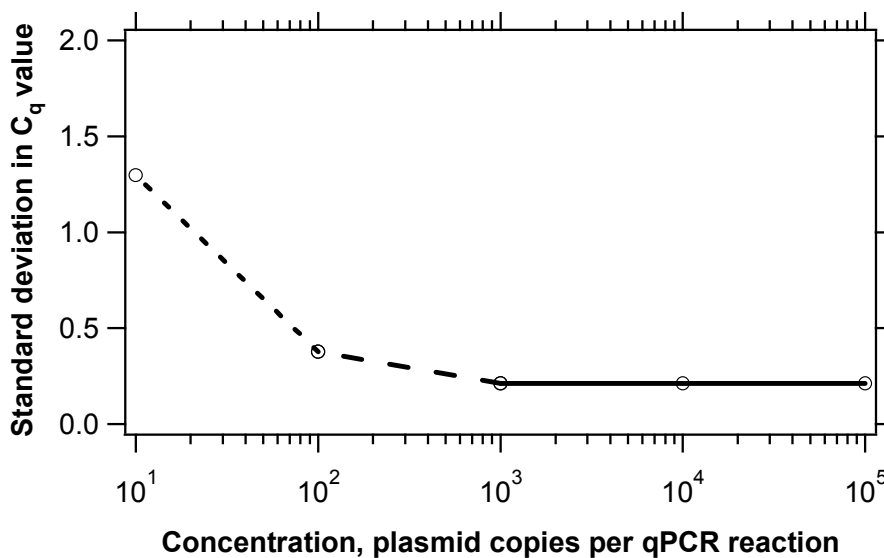

**Supplementary Figure S1** Standard deviation in HF183Taqman C<sub>q</sub> values at decimal dilutions of plasmid standard and linear interpolation between adjacent levels. The dilutions with concentration > 10<sup>2</sup> copies/rxn were combined to calculate the group variance. Due to heteroscedasticity, the standard deviation and variance are larger at lower plasmid concentrations.

---

\* Author to whom correspondence should be addressed: Dan Wang, Dept. Civil and Environmental Engineering, 473 Via Ortega Room M08, Stanford University, Stanford, CA 94305, tel: 650 725 3025, e-mail: vdwang@stanford.edu

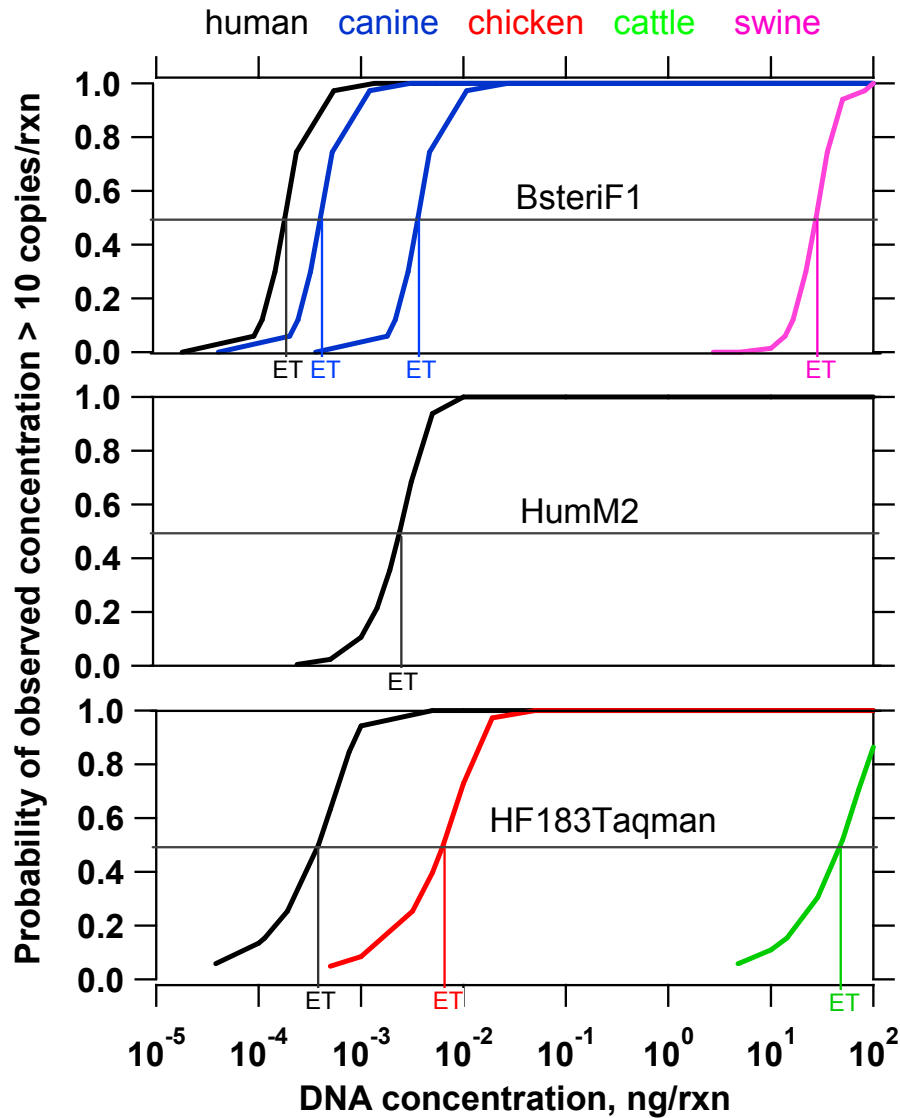

**Supplementary Figure S2** Probability curves of the three human-associated assays. The probability curves that the observed concentration will be higher than the LOD of 10 marker copies per reaction are plotted for target and amplified non-target sources. The equivalent threshold (ET) value is indicated at the probability of 0.5. The assay with lower ET for target source (human) is more sensitive while the assay with shorter distance between ETs of target and non-target sources is more specific
